# Supplementary material for: Novel Respiratory Syncytial Virus-Like Particle Vaccine Composed of the Postfusion and Prefusion Conformations of the F Glycoprotein
Source: PubMed Central journal article supplement (PMC4895010; doi:10.1128/cvi.00720-15), 2016-06-06
Supplement: CVI.00720-15_zcd999095353so1.pdf [file CVI.00720-15_zcd999095353so1.pdf]

1 **SUPPLEMENTAL MATERIAL**

2

| F Constructs                                              | 5C4  | 131-2A | Palivizum. |
|-----------------------------------------------------------|------|--------|------------|
| Wild Type                                                 | 1.0  | 1.0    | 1.0        |
| S155C-S290C (McLellan et al)                              | 8.0  | 0.1    | 0.1        |
| A102C-I148C                                               | 3.2  | 0.5    | 1.0        |
| N105C-G145C                                               | ND   | ND     | ND         |
| N105C-I148C                                               | 3.7  | 0.4    | 0.6        |
| F32C-L467C                                                | 0.1  | ND     | ND         |
| E30C-L467C                                                | ND   | ND     | ND         |
| F32C-Y468C                                                | ND   | ND     | ND         |
| F32C-V469C                                                | 0.1  | ND     | ND         |
| A102C-I148C, S155C-S290C                                  | 13.9 | 0.1    | 0.1        |
| Furin Site 1* and Furin Site 2 <sup>§</sup>               | 2.3  | 0.7    | 0.7        |
| Furin Site 1* and Furin Site 2 <sup>§</sup> , A102C-I148C | 0.7  | 0.2    | 0.1        |

3

4 \* Mutations Furin Site 1: R133K R135H R136Q

5 <sup>§</sup> Mutations Furin Site 2: R106K R108H R109Q

6

7 **Supplemental Table 1) List of prefusion F constructs generated by mutagenesis.**

8 RSV F constructs were tested by immunoblot analysis. The presence and quantity of the  
 9 prefusion epitope  $\phi$  was determined using the 5C4 antibody. The presence of the postfusion antigenic site

10 I was assessed using the 131-2a antibody, and the level of protein expression was determined using the  
 11 palivizumab antibody. Quantification is normalized with respect to the immunoreactivity of the wild type

12 RSV F construct

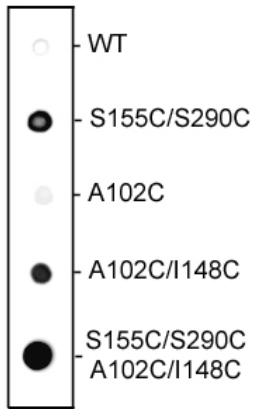

13

14 **Supplemental Figure 1) 5C4 immunoreactivity of RSV F prefusion constructs**

15           Dot blot analysis showing the immune reactivity of recombinant RSV F proteins with  
16 combination of cysteine mutations. To assess whether the disulfide bridge A129C/I148C enhanced the  
17 stability of F provided by S155C/S290C, we tested an intermediate mutant having S155C/S290C and only  
18 one cysteine change, A129C. This construct demonstrated reactivity with 5C4 equivalent to  
19 S155C/S290C, and much lower than the F that contained both disulfide bridges (S155C/S290C) and  
20 A102C/I148C.

21

22

23

24

25

26

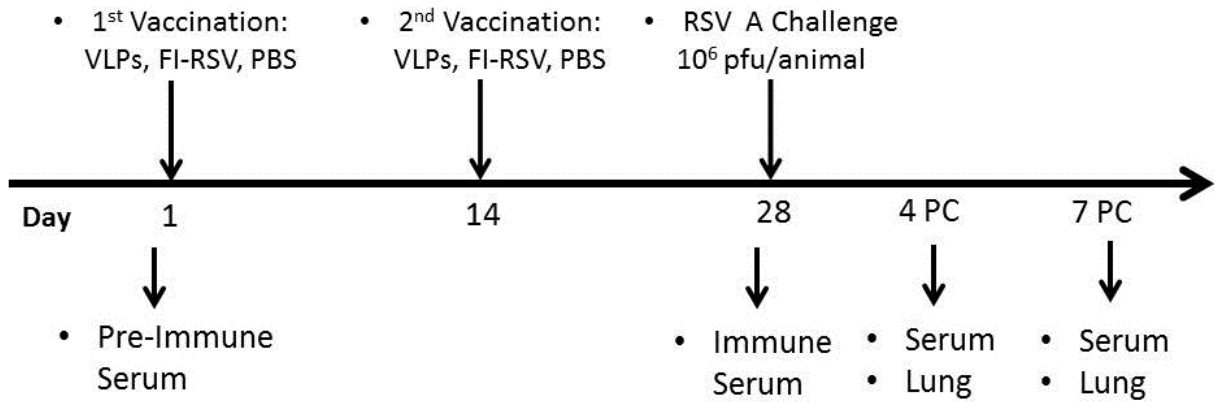

27

28 **Supplemental Figure 2) Diagram of the vaccination schedule used in BALB/C mice**

29 Sero-negative mice were immunized by intramuscular injection at day 1 and 14. Mice were  
 30 challenged with  $1 \times 10^6$  pfu of RSV A Long strain administered via the intranasal route at day 28; animals  
 31 were sacrificed at days 4 and 7 post RSV-challenge (PC).
